# Supplementary material
Source: publisher figshare collection journal article supplement (https://wiley.figshare.com/articles/dataset/_/3521642)
Supplement: Supplementary file 1 [file 1]

ESA SUPPLEMENTARY PUBLICATION SERVICE

Document No. ESPS-8902

Supplement to  
HABITAT USE AND HABITAT OVERLAP OF RIPARIAN  
BIRDS IN THREE ELEVATIONAL ZONES

by

Deborah M. Finch

ECOLOGY Volume 70

(1989)

## Microfiche Material

Author: Deborah M. Finch

Title: Habitat use and habitat overlap of riparian birds in three  
          elevational zones

Name of Journal: Ecology

Journal Volume No.: 70

Table 1 of the microfiche publication contains the mean ( $\pm$  S.E.) scores of five principal components for 20 bird species and a random sample. The principal components analysis was used to examine the position of each bird species and the random habitat centroid in  $n$ -dimensional habitat space. Table 2 contains the means ( $\pm$  S.E.) of 19 original habitat variables for 20 bird species and a random sample. Habitat was sampled at breeding territories of each bird species and at 40 random stations. Refer to Table 1 of the journal article for definitions of habitat variables and Appendix 1 of the article for common and scientific names of bird species.

Table 1. Mean scores  $\pm$  standard errors of five principal components (PC) for 20 species.<sup>a</sup>

| Group  | <u>n</u> | PC1   |            | PC2   |            | PC3   |            | PC4   |            | PC5   |            |
|--------|----------|-------|------------|-------|------------|-------|------------|-------|------------|-------|------------|
| Random | 400      | -0.15 | $\pm$ 0.05 | -0.13 | $\pm$ 0.05 | -0.11 | $\pm$ 0.05 | -0.06 | $\pm$ 0.04 | 0.01  | $\pm$ 0.04 |
| MODO   | 11       | 1.04  | $\pm$ 0.18 | -0.55 | $\pm$ 0.30 | -0.08 | $\pm$ 0.28 | -0.01 | $\pm$ 0.29 | -0.14 | $\pm$ 0.30 |
| BTHU   | 16       | 0.09  | $\pm$ 0.18 | 0.01  | $\pm$ 0.18 | 0.32  | $\pm$ 0.18 | 0.05  | $\pm$ 0.29 | 0.07  | $\pm$ 0.16 |
| WWPE   | 15       | 1.14  | $\pm$ 0.12 | -0.58 | $\pm$ 0.20 | -0.12 | $\pm$ 0.24 | -0.25 | $\pm$ 0.22 | -0.23 | $\pm$ 0.24 |
| WIFL   | 11       | 1.12  | $\pm$ 0.34 | 0.09  | $\pm$ 0.20 | -0.21 | $\pm$ 0.29 | 0.34  | $\pm$ 0.20 | 0.02  | $\pm$ 0.24 |
| DUFL   | 7        | -0.50 | $\pm$ 0.10 | 0.36  | $\pm$ 0.30 | 0.53  | $\pm$ 0.34 | 0.79  | $\pm$ 0.32 | 0.47  | $\pm$ 0.09 |
| TRSW   | 8        | 0.80  | $\pm$ 0.29 | -1.23 | $\pm$ 0.45 | -0.20 | $\pm$ 0.34 | 0.37  | $\pm$ 0.19 | -0.80 | $\pm$ 0.44 |
| HOWR   | 30       | 1.16  | $\pm$ 0.15 | -0.25 | $\pm$ 0.14 | -0.14 | $\pm$ 0.17 | 0.07  | $\pm$ 0.18 | -0.16 | $\pm$ 0.17 |
| VEER   | 21       | 0.31  | $\pm$ 0.21 | 0.10  | $\pm$ 0.15 | 0.26  | $\pm$ 0.20 | 0.25  | $\pm$ 0.20 | -0.06 | $\pm$ 0.18 |
| AMRO   | 41       | 0.66  | $\pm$ 0.13 | 0.02  | $\pm$ 0.13 | 0.13  | $\pm$ 0.16 | 0.29  | $\pm$ 0.13 | 0.08  | $\pm$ 0.13 |
| GRCA   | 9        | 0.29  | $\pm$ 0.32 | 0.03  | $\pm$ 0.30 | -0.25 | $\pm$ 0.29 | -0.05 | $\pm$ 0.26 | 0.38  | $\pm$ 0.13 |
| WAVI   | 16       | 1.07  | $\pm$ 0.25 | 0.05  | $\pm$ 0.16 | -0.02 | $\pm$ 0.25 | 0.17  | $\pm$ 0.22 | 0.11  | $\pm$ 0.19 |
| YEWA   | 60       | 0.29  | $\pm$ 0.12 | 0.17  | $\pm$ 0.11 | 0.20  | $\pm$ 0.11 | 0.28  | $\pm$ 0.11 | 0.07  | $\pm$ 0.09 |
| MGWA   | 10       | -0.39 | $\pm$ 0.10 | 0.44  | $\pm$ 0.15 | 0.67  | $\pm$ 0.24 | 0.17  | $\pm$ 0.26 | 0.43  | $\pm$ 0.11 |
| COYE   | 12       | -0.40 | $\pm$ 0.12 | 0.54  | $\pm$ 0.16 | 0.38  | $\pm$ 0.20 | -0.12 | $\pm$ 0.24 | 0.52  | $\pm$ 0.16 |
| WIWA   | 28       | -0.69 | $\pm$ 0.03 | 0.54  | $\pm$ 0.11 | -0.04 | $\pm$ 0.15 | -0.56 | $\pm$ 0.06 | -0.12 | $\pm$ 0.13 |
| SOSP   | 40       | -0.17 | $\pm$ 0.11 | 0.33  | $\pm$ 0.15 | 0.21  | $\pm$ 0.15 | 0.48  | $\pm$ 0.13 | -0.16 | $\pm$ 0.16 |
| LISP   | 60       | -0.65 | $\pm$ 0.03 | 0.31  | $\pm$ 0.08 | 0.06  | $\pm$ 0.10 | -0.31 | $\pm$ 0.10 | -0.06 | $\pm$ 0.09 |
| WCSP   | 24       | -0.71 | $\pm$ 0.03 | 0.37  | $\pm$ 0.10 | 0.01  | $\pm$ 0.18 | -0.60 | $\pm$ 0.11 | -0.07 | $\pm$ 0.13 |
| BRBL   | 17       | -0.30 | $\pm$ 0.18 | 0.20  | $\pm$ 0.18 | 0.36  | $\pm$ 0.21 | 0.19  | $\pm$ 0.22 | 0.48  | $\pm$ 0.09 |
| BHCO   | 8        | 0.38  | $\pm$ 0.28 | -0.27 | $\pm$ 0.27 | 0.29  | $\pm$ 0.46 | 0.37  | $\pm$ 0.32 | -0.24 | $\pm$ 0.39 |

<sup>a</sup>Refer to Appendix 1 for common and scientific names of bird species

Table 2. Means  $\pm$  standard errors of original variables for 20 species.<sup>a</sup>

| Variable                   | RANDOM |           | MODO  |            | BTHU |            | WWPE  |            | WIFL  |            | DUFL  |            | TRSW  |            |
|----------------------------|--------|-----------|-------|------------|------|------------|-------|------------|-------|------------|-------|------------|-------|------------|
| CANHT (m)                  | 4.0    | $\pm$ 0.2 | 8.3   | $\pm$ 0.9  | 4.6  | $\pm$ 0.8  | 7.9   | $\pm$ 0.6  | 7.9   | $\pm$ 1.4  | 2.9   | $\pm$ 1.0  | 7.4   | $\pm$ 1.2  |
| TDEN (100 m <sup>2</sup> ) | 10.8   | $\pm$ 0.3 | 39.0  | $\pm$ 23.2 | 52.8 | $\pm$ 13.1 | 250.9 | $\pm$ 20.2 | 16.9  | $\pm$ 2.2  | 0.0   | $\pm$ 0.0  | 42.0  | $\pm$ 15.2 |
| CANCOV (%)                 | 22.9   | $\pm$ 1.7 | 51.3  | $\pm$ 11.4 | 21.3 | $\pm$ 7.0  | 41.9  | $\pm$ 8.8  | 62.7  | $\pm$ 11.3 | 25.0  | $\pm$ 13.7 | 53.3  | $\pm$ 12.2 |
| SHBA (m <sup>2</sup> )     | 0.3    | $\pm$ 0.0 | 0.1   | $\pm$ 0.1  | 0.3  | $\pm$ 0.0  | 0.1   | $\pm$ 0.1  | 0.3   | $\pm$ 0.2  | 0.5   | $\pm$ 0.2  | 0.3   | $\pm$ 0.1  |
| SHCD (cm)                  | 32.3   | $\pm$ 4.2 | 132.1 | $\pm$ 30.6 | 52.6 | $\pm$ 15.6 | 25.5  | $\pm$ 19.8 | 127.9 | $\pm$ 21.7 | 176.4 | $\pm$ 36.2 | 155.3 | $\pm$ 39.5 |
| SHHT (m)                   | 1.8    | $\pm$ 0.1 | 1.8   | $\pm$ 0.2  | 2.0  | $\pm$ 0.1  | 2.2   | $\pm$ 0.6  | 1.8   | $\pm$ 0.2  | 2.9   | $\pm$ 1.0  | 2.0   | $\pm$ 0.3  |
| SHDIS (m)                  | 4.9    | $\pm$ 0.3 | 6.8   | $\pm$ 3.5  | 3.3  | $\pm$ 0.5  | 6.5   | $\pm$ 1.8  | 2.4   | $\pm$ 0.6  | 2.4   | $\pm$ 0.8  | 13.0  | $\pm$ 5.2  |
| VFD1 (#hits)               | 2.6    | $\pm$ 1.0 | 1.9   | $\pm$ 0.3  | 1.9  | $\pm$ 0.3  | 1.4   | $\pm$ 0.2  | 1.8   | $\pm$ 0.3  | 2.9   | $\pm$ 0.6  | 1.3   | $\pm$ 0.3  |
| VFD2 (#hits)               | 1.2    | $\pm$ 0.1 | 0.5   | $\pm$ 0.2  | 0.8  | $\pm$ 0.3  | 0.3   | $\pm$ 0.1  | 0.9   | $\pm$ 0.3  | 0.8   | $\pm$ 0.3  | 0.1   | $\pm$ 0.1  |
| VFD3 (#hits)               | 0.5    | $\pm$ 0.1 | 0.4   | $\pm$ 0.3  | 0.9  | $\pm$ 0.3  | 0.1   | $\pm$ 0.1  | 0.4   | $\pm$ 0.1  | 1.3   | $\pm$ 0.5  | 0.2   | $\pm$ 0.1  |
| VFD4 (#hits)               | 0.5    | $\pm$ 0.1 | 1.4   | $\pm$ 0.5  | 0.6  | $\pm$ 0.3  | 0.7   | $\pm$ 0.3  | 1.8   | $\pm$ 0.6  | 0.7   | $\pm$ 0.4  | 0.6   | $\pm$ 0.3  |
| VFD5 (#hits)               | 0.1    | $\pm$ 0.0 | 0.2   | $\pm$ 0.2  | 0.1  | $\pm$ 0.1  | 0.3   | $\pm$ 0.1  | 0.7   | $\pm$ 0.3  | 0.0   | $\pm$ 0.0  | 0.1   | $\pm$ 0.1  |
| COVER (%)                  | 34.4   | $\pm$ 2.1 | 10.2  | $\pm$ 2.8  | 36.7 | $\pm$ 7.8  | 8.3   | $\pm$ 2.9  | 26.1  | $\pm$ 9.6  | 21.3  | $\pm$ 9.8  | 10.9  | $\pm$ 9.3  |
| WILL (%)                   | 67.6   | $\pm$ 1.9 | 27.3  | $\pm$ 12.9 | 62.5 | $\pm$ 8.2  | 20.0  | $\pm$ 7.4  | 18.2  | $\pm$ 9.6  | 89.3  | $\pm$ 5.1  | 34.4  | $\pm$ 14.9 |
| EVH (m)                    | 0.5    | $\pm$ 0.0 | 0.5   | $\pm$ 0.2  | 0.6  | $\pm$ 0.1  | 0.2   | $\pm$ 0.0  | 0.4   | $\pm$ 0.2  | 1.4   | $\pm$ 0.3  | 0.1   | $\pm$ 0.0  |
| FRUIT (%)                  | 24.2   | $\pm$ 1.7 | 50.0  | $\pm$ 12.2 | 28.1 | $\pm$ 7.2  | 56.7  | $\pm$ 7.9  | 65.9  | $\pm$ 11.8 | 3.6   | $\pm$ 3.6  | 65.6  | $\pm$ 14.9 |
| BARE (%)                   | 14.3   | $\pm$ 1.3 | 41.0  | $\pm$ 9.9  | 11.0 | $\pm$ 6.0  | 47.5  | $\pm$ 8.9  | 18.2  | $\pm$ 8.0  | 0.0   | $\pm$ 0.0  | 59.4  | $\pm$ 16.3 |
| WATER (%)                  | 3.4    | $\pm$ 0.7 | 0.0   | $\pm$ 0.0  | 0.8  | $\pm$ 0.8  | 0.0   | $\pm$ 0.0  | 0.0   | $\pm$ 0.0  | 3.6   | $\pm$ 3.6  | 0.0   | $\pm$ 0.0  |

Table 2. (Continued)

| Variable                   | HOWR             | VEER             | AMRO             | GRCA             | WAVI            | YEWA           | MGWA             |
|----------------------------|------------------|------------------|------------------|------------------|-----------------|----------------|------------------|
| CANHT (m)                  | 9.4 $\pm$ 0.9    | 6.1 $\pm$ 1.2    | 7.9 $\pm$ 0.6    | 5.9 $\pm$ 1.5    | 9.1 $\pm$ 1.4   | 5.8 $\pm$ 0.6  | 2.6 $\pm$ 0.4    |
| TDEN (100 m <sup>2</sup> ) | 94.8 $\pm$ 18.6  | 135.5 $\pm$ 22.0 | 29.9 $\pm$ 3.8   | 14.9 $\pm$ 3.4   | 23.0 $\pm$ 4.7  | 16.3 $\pm$ 1.4 | 7.9 $\pm$ 0.5    |
| CANCOV (%)                 | 53.1 $\pm$ 7.0   | 38.9 $\pm$ 7.7   | 44.7 $\pm$ 5.7   | 29.3 $\pm$ 13.4  | 63.4 $\pm$ 9.5  | 6.0 $\pm$ 4.4  | 12.6 $\pm$ 5.0   |
| SHBA (m <sup>2</sup> )     | 0.1 $\pm$ 0.0    | 0.2 $\pm$ 0.1    | 0.2 $\pm$ 0.1    | 0.2 $\pm$ 0.1    | 0.1 $\pm$ 0.1   | 0.3 $\pm$ 0.1  | 0.8 $\pm$ 0.2    |
| SHCD (cm)                  | 122.4 $\pm$ 13.8 | 147.9 $\pm$ 16.7 | 139.3 $\pm$ 14.4 | 101.8 $\pm$ 14.3 | 42.2 $\pm$ 24.0 | 3.8 $\pm$ 10.1 | 191.6 $\pm$ 23.0 |
| SHHT (m)                   | 2.1 $\pm$ 0.3    | 2.2 $\pm$ 0.2    | 2.1 $\pm$ 0.2    | 1.6 $\pm$ 0.2    | 1.9 $\pm$ 0.2   | 2.0 $\pm$ 0.1  | 2.4 $\pm$ 0.4    |
| SHDIS (m)                  | 4.4 $\pm$ 0.9    | 2.8 $\pm$ 0.5    | 3.9 $\pm$ 0.8    | 3.1 $\pm$ 1.3    | 2.7 $\pm$ 0.4   | 3.0 $\pm$ 0.5  | 2.2 $\pm$ 0.3    |
| VFD1 (#hits)               | 1.5 $\pm$ 0.2    | 1.8 $\pm$ 0.3    | 2.4 $\pm$ 0.2    | 2.3 $\pm$ 0.4    | 2.3 $\pm$ 0.6   | 2.5 $\pm$ 0.3  | 4.2 $\pm$ 0.6    |
| VFD2 (#hits)               | 0.4 $\pm$ 0.1    | 1.2 $\pm$ 0.4    | 0.8 $\pm$ 0.2    | 1.0 $\pm$ 0.4    | 0.6 $\pm$ 0.2   | 1.2 $\pm$ 0.2  | 1.6 $\pm$ 0.5    |
| VFD3 (#hits)               | 0.3 $\pm$ 0.1    | 0.4 $\pm$ 0.2    | 0.5 $\pm$ 0.1    | 0.3 $\pm$ 0.2    | 0.4 $\pm$ 0.2   | 0.6 $\pm$ 0.1  | 0.6 $\pm$ 0.2    |
| VFD4 (#hits)               | 1.0 $\pm$ 0.2    | 0.5 $\pm$ 0.2    | 1.1 $\pm$ 0.2    | 0.3 $\pm$ 0.2    | 1.1 $\pm$ 0.3   | 0.7 $\pm$ 0.1  | 0.2 $\pm$ 0.1    |
| VFD5 (#hits)               | 0.6 $\pm$ 0.2    | 0.1 $\pm$ 0.1    | 0.3 $\pm$ 0.1    | 0.1 $\pm$ 0.1    | 0.5 $\pm$ 0.2   | 0.1 $\pm$ 0.1  | 0.0 $\pm$ 0.0    |
| COVER (%)                  | 18.6 $\pm$ 3.7   | 19.5 $\pm$ 3.9   | 22.9 $\pm$ 3.5   | 17.9 $\pm$ 7.0   | 17.9 $\pm$ 4.4  | 1.4 $\pm$ 3.9  | 25.1 $\pm$ 8.8   |
| WILL (%)                   | 17.8 $\pm$ 4.0   | 52.8 $\pm$ 7.4   | 46.5 $\pm$ 6.4   | 50.0 $\pm$ 13.8  | 31.8 $\pm$ 8.7  | 6.0 $\pm$ 5.0  | 75.0 $\pm$ 9.9   |
| EVH (m)                    | 0.3 $\pm$ 0.1    | 0.9 $\pm$ 0.2    | 0.8 $\pm$ 0.1    | 0.8 $\pm$ 0.2    | 0.6 $\pm$ 0.2   | 1.0 $\pm$ 0.1  | 1.4 $\pm$ 0.2    |
| FRUIT (%)                  | 59.2 $\pm$ 6.5   | 26.6 $\pm$ 6.6   | 42.7 $\pm$ 7.2   | 41.7 $\pm$ 11.0  | 46.9 $\pm$ 10.4 | 5.0 $\pm$ 5.1  | 5.0 $\pm$ 5.0    |
| BARE (%)                   | 36.7 $\pm$ 5.8   | 22.0 $\pm$ 7.1   | 21.9 $\pm$ 4.4   | 9.7 $\pm$ 5.4    | 22.6 $\pm$ 6.9  | 8.3 $\pm$ 3.4  | 2.4 $\pm$ 1.6    |
| GRASS (%)                  | 43.9 $\pm$ 5.8   | 53.1 $\pm$ 7.6   | 54.4 $\pm$ 4.7   | 69.7 $\pm$ 8.4   | 59.6 $\pm$ 8.3  | 9.1 $\pm$ 4.0  | 66.3 $\pm$ 9.0   |
| WATER (%)                  | 0.8 $\pm$ 0.8    | 5.4 $\pm$ 2.5    | 0.9 $\pm$ 0.5    | 2.8 $\pm$ 2.8    | 0.0 $\pm$ 0.0   | 2.9 $\pm$ 1.1  | 6.2 $\pm$ 3.4    |

Table 2. (Continued)

| Variable                   | COYE            | WIWA             | SOSP             | LIISP           | WCSP             | BRBL             | BHCO             |
|----------------------------|-----------------|------------------|------------------|-----------------|------------------|------------------|------------------|
| CANHT (m)                  | 2.6 $\pm$ 0.4   | 1.6 $\pm$ 0.2    | 4.0 $\pm$ 0.5    | 1.7 $\pm$ 0.1   | 1.4 $\pm$ 0.1    | 3.8 $\pm$ 1.1    | 5.9 $\pm$ 1.1    |
| TDEN (100 m <sup>2</sup> ) | 7.7 $\pm$ 0.6   | 0.0 $\pm$ 0.0    | 9.7 $\pm$ 0.7    | 0.0 $\pm$ 0.0   | 0.0 $\pm$ 0.0    | 14.0 $\pm$ 3.5   | 0.0 $\pm$ 0.0    |
| CANCOV (%)                 | 9.4 $\pm$ 4.4   | 0.0 $\pm$ 0.0    | 27.6 $\pm$ 4.8   | 9.6 $\pm$ 3.1   | 1.0 $\pm$ 1.0    | 18.5 $\pm$ 5.9   | 34.6 $\pm$ 11.6  |
| SHBA (m <sup>2</sup> )     | 0.6 $\pm$ 0.2   | 0.5 $\pm$ 0.1    | 0.4 $\pm$ 0.1    | 0.3 $\pm$ 0.0   | 0.5 $\pm$ 0.1    | 0.4 $\pm$ 0.1    | 0.4 $\pm$ 0.2    |
| SHCD (cm)                  | 46.6 $\pm$ 20.1 | 123.2 $\pm$ 11.4 | 149.4 $\pm$ 16.4 | 140.8 $\pm$ 8.5 | 144.8 $\pm$ 16.0 | 168.2 $\pm$ 22.4 | 169.2 $\pm$ 38.7 |
| SHHT (m)                   | 2.2 $\pm$ 0.3   | 1.6 $\pm$ 0.2    | 2.1 $\pm$ 0.2    | 1.6 $\pm$ 0.1   | 1.4 $\pm$ 0.1    | 2.0 $\pm$ 0.2    | 2.8 $\pm$ 1.0    |
| SHDIS (m)                  | 1.8 $\pm$ 0.3   | 2.0 $\pm$ 0.3    | 3.0 $\pm$ 0.7    | 2.6 $\pm$ 0.3   | 3.0 $\pm$ 0.4    | 2.2 $\pm$ 0.6    | 3.9 $\pm$ 1.3    |
| VFD1 (#hits)               | 2.5 $\pm$ 0.5   | 3.3 $\pm$ 0.4    | 2.4 $\pm$ 0.3    | 3.3 $\pm$ 0.3   | 3.2 $\pm$ 0.4    | 3.1 $\pm$ 0.4    | 2.0 $\pm$ 0.6    |
| VFD2 (#hits)               | 1.4 $\pm$ 0.3   | 1.8 $\pm$ 0.2    | 1.4 $\pm$ 0.3    | 1.3 $\pm$ 0.2   | 1.7 $\pm$ 0.3    | 1.1 $\pm$ 0.3    | 0.5 $\pm$ 0.3    |
| VFD3 (#hits)               | 0.7 $\pm$ 0.3   | 0.3 $\pm$ 0.1    | 0.8 $\pm$ 0.2    | 0.4 $\pm$ 0.1   | 0.2 $\pm$ 0.1    | 0.7 $\pm$ 0.2    | 0.5 $\pm$ 0.3    |
| VFD4 (#hits)               | 0.2 $\pm$ 0.2   | 0.0 $\pm$ 0.0    | 0.6 $\pm$ 0.2    | 0.2 $\pm$ 0.1   | 0.0 $\pm$ 0.0    | 0.3 $\pm$ 0.2    | 0.9 $\pm$ 0.3    |
| VFD5 (#hits)               | 0.0 $\pm$ 0.0   | 0.0 $\pm$ 0.0    | 0.0 $\pm$ 0.0    | 0.0 $\pm$ 0.0   | 0.0 $\pm$ 0.0    | 0.0 $\pm$ 0.0    | 0.0 $\pm$ 0.0    |
| COVER (%)                  | 34.3 $\pm$ 7.9  | 58.2 $\pm$ 6.4   | 40.5 $\pm$ 5.0   | 43.5 $\pm$ 4.0  | 55.8 $\pm$ 6.8   | 17.4 $\pm$ 3.5   | 11.0 $\pm$ 6.0   |
| WILL (%)                   | 91.7 $\pm$ 4.7  | 98.2 $\pm$ 1.8   | 70.0 $\pm$ 5.2   | 92.1 $\pm$ 2.4  | 95.8 $\pm$ 4.2   | 79.9 $\pm$ 7.6   | 50.0 $\pm$ 14.9  |
| EVH (m)                    | 1.3 $\pm$ 0.3   | 0.9 $\pm$ 0.1    | 1.1 $\pm$ 0.1    | 1.0 $\pm$ 0.1   | 0.9 $\pm$ 0.1    | 0.9 $\pm$ 0.2    | 0.8 $\pm$ 0.3    |
| FRUIT (%)                  | 2.1 $\pm$ 2.1   | 1.8 $\pm$ 1.8    | 20.6 $\pm$ 4.4   | 3.3 $\pm$ 1.1   | 4.2 $\pm$ 4.2    | 12.2 $\pm$ 6.2   | 40.6 $\pm$ 15.6  |
| BARE (%)                   | 1.1 $\pm$ 1.1   | 2.1 $\pm$ 0.9    | 11.2 $\pm$ 3.6   | 6.2 $\pm$ 1.6   | 0.5 $\pm$ 0.5    | 1.5 $\pm$ 1.5    | 31.4 $\pm$ 13.4  |
| GRASS (%)                  | 56.3 $\pm$ 8.7  | 37.0 $\pm$ 6.2   | 41.4 $\pm$ 5.1   | 45.3 $\pm$ 4.1  | 39.0 $\pm$ 7.4   | 75.2 $\pm$ 4.9   | 45.1 $\pm$ 10.8  |
| WATER (%)                  | 8.3 $\pm$ 5.4   | 2.6 $\pm$ 1.5    | 6.9 $\pm$ 3.0    | 5.0 $\pm$ 1.5   | 4.7 $\pm$ 2.4    | 5.9 $\pm$ 2.9    | 12.5 $\pm$ 5.3   |

<sup>a</sup>Refer to Table 1 of the article for definitions of habitat variables and Appendix 1 for species names.
